# Supplementary material for: Association of ideal cardiovascular health at age 50 with incidence of dementia: 25 year follow-up of Whitehall II cohort study
Source: PubMed Central journal article supplement (PMC6664261; doi:10.1136/bmj.l4414), 2019-07-31
Supplement: sabs049100.ww1.pdf [file sabs049100.ww1.pdf]

**SUPPLEMENTARY MATERIALS**

**Figure A. Probability of survival free of dementia by CVH score at age 50**

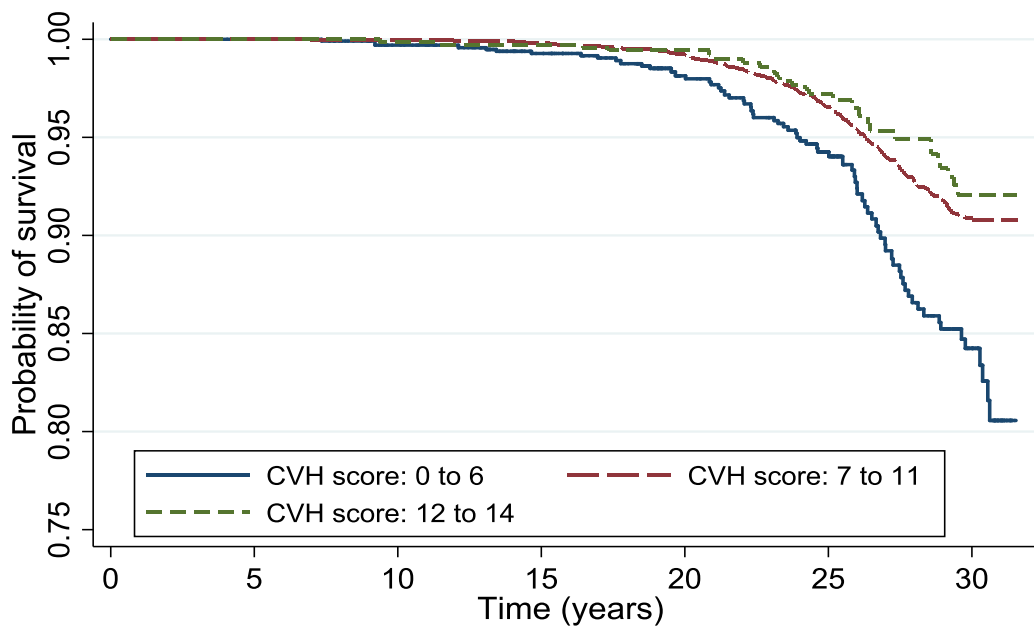

| Years of follow-up      | 0-4.9    | 5-9.9    | 10-14.9   | 15-19.9   | 20-24.9    | 25-29.9    | 30-31.6  |
|-------------------------|----------|----------|-----------|-----------|------------|------------|----------|
| <b>N dementia cases</b> | <b>0</b> | <b>4</b> | <b>15</b> | <b>36</b> | <b>127</b> | <b>160</b> | <b>5</b> |

Abbreviations: CVH, cardiovascular health.

**Table A. Metrics distribution at age 50 (%)**

|                          | All<br>N=7899 | CVH score           |                                  |                             |
|--------------------------|---------------|---------------------|----------------------------------|-----------------------------|
|                          |               | Poor (0-6)<br>N=978 | Intermediate<br>(7-11)<br>N=5997 | Optimal<br>(12-14)<br>N=924 |
| <b>Smoking</b>           |               |                     |                                  |                             |
| Poor                     | 1239 (15.7)   | 490 (50.1)          | 747 (12.5)                       | 2 (0.2)                     |
| Intermediate             | 313 (4.0)     | 71 (7.3)            | 230 (3.8)                        | 12 (1.3)                    |
| Optimal                  | 6347 (80.3)   | 417 (42.6)          | 5020 (83.7)                      | 910 (98.5)                  |
| <b>Diet</b>              |               |                     |                                  |                             |
| Poor                     | 2789 (35.3)   | 674 (68.9)          | 2068 (34.5)                      | 47 (5.1)                    |
| Intermediate             | 3748 (47.5)   | 282 (28.8)          | 3081 (51.4)                      | 382 (41.7)                  |
| Optimal                  | 1362 (17.2)   | 22 (2.3)            | 848 (14.1)                       | 492 (53.2)                  |
| <b>Physical activity</b> |               |                     |                                  |                             |
| Poor                     | 1310 (16.6)   | 479 (49.0)          | 820 (13.7)                       | 11 (1.2)                    |
| Intermediate             | 2625 (33.2)   | 331 (33.8)          | 2123 (35.4)                      | 171 (18.5)                  |
| Optimal                  | 3964 (50.2)   | 168 (17.2)          | 3054 (50.9)                      | 742 (80.3)                  |
| <b>BMI</b>               |               |                     |                                  |                             |
| Poor                     | 849 (10.7)    | 352 (36.0)          | 495 (8.3)                        | 2 (0.2)                     |
| Intermediate             | 3024 (38.3)   | 459 (46.9)          | 2464 (41.1)                      | 101 (10.9)                  |
| Optimal                  | 4026 (51.0)   | 167 (17.1)          | 3038 (50.7)                      | 821 (88.9)                  |
| <b>Glucose</b>           |               |                     |                                  |                             |
| Poor                     | 112 (1.4)     | 60 (6.1)            | 52 (0.9)                         | 0 (0.0)                     |
| Intermediate             | 855 (10.8)    | 222 (22.7)          | 607 (10.1)                       | 26 (2.8)                    |
| Optimal                  | 6932 (87.8)   | 696 (70.2)          | 5338 (89.0)                      | 898 (97.2)                  |
| <b>Cholesterol</b>       |               |                     |                                  |                             |
| Poor                     | 3523 (44.6)   | 737 (75.4)          | 2742 (45.7)                      | 44 (4.8)                    |
| Intermediate             | 2926 (37.0)   | 220 (22.5)          | 2339 (39.0)                      | 367 (39.7)                  |
| Optimal                  | 1450 (18.4)   | 21 (2.2)            | 916 (15.3)                       | 513 (55.5)                  |
| <b>Blood pressure</b>    |               |                     |                                  |                             |
| Poor                     | 1468 (18.6)   | 451 (46.1)          | 1010 (16.8)                      | 7 (0.8)                     |
| Intermediate             | 3399 (43.0)   | 416 (42.5)          | 2797 (46.6)                      | 186 (20.1)                  |
| Optimal                  | 3032 (38.4)   | 111 (11.4)          | 2190 (36.5)                      | 731 (79.1)                  |

Abbreviations: BMI, body mass index; CVH, cardiovascular health.

**Table B. CVH score and incidence of dementia, additional adjustment for APOE ε4 (N cases/N total = 176/4996)**

|                                                                     | <b>HR for dementia<br/>(95%CI)<br/>Model 1*</b> | <b>P</b> | <b>HR for dementia<br/>(95%CI)<br/>Model 1 + APOE ε4</b> | <b>P</b> |
|---------------------------------------------------------------------|-------------------------------------------------|----------|----------------------------------------------------------|----------|
| <b>CVH score</b>                                                    |                                                 |          |                                                          |          |
| <i>1-point increment in the CVH score<br/>(range, 0-14)</i>         | 0.89 (0.82 to 0.96)                             | 0.005    | 0.89 (0.82 to 0.97)                                      | 0.007    |
| <i>Each additional CVH metric at optimal<br/>level (range, 0-7)</i> | 0.86 (0.75 to 1.00)                             | 0.05     | 0.87 (0.75 to 1.01)                                      | 0.08     |

Abbreviations: APOE, apolipoprotein E; CI, confidence interval; CVH, cardiovascular health; HR, hazard ratio.

\*HR estimated among the 4996 participants with data on APOE, using inverse probability weighted Cox regression models with age as time-scale and adjusted for sex, ethnicity, education, occupational position, and marital status.
